# Supplementary material for: A convenient green preparation of layered double hydroxide/polyacrylamide nanocomposite hydrogels with ultrahigh deformability
Source: Royal Society of Chemistry journal article supplement (doi:10.1039/c5sm02232k), 2015-01-01
Supplement: c5sm02232k1.pdf [file c5sm02232k1.pdf]

**Electronic Supplementary Material (ESI) for Soft Matter**

**This journal is © The Royal Society of Chemistry 2015**

## **Supplementary Information**

**A convenient green preparation of layered double hydroxide/  
polyacrylamide nanocomposite hydrogels with ultrahigh  
deformability**

*Lianying Wu,<sup>a,c</sup> Ziqiao Hu,<sup>a</sup> Guangming Chen,<sup>\*a</sup> Zhibo Li<sup>\*a,b</sup>*

<sup>a</sup> Beijing National Laboratory for Molecular Sciences (BNLMS), Institute of Chemistry, Chinese Academy of Sciences, Beijing 100190, P. R. China. E-mail: chengm@iccas.ac.cn

<sup>b</sup> School of Polymer Science and Engineering, Qingdao University of Science and Technology, Qingdao 266042, P. R. China. E-mail: zbli@qust.edu.cn

<sup>c</sup> University of Chinese Academy of Science, Beijing 100049, P. R. China

\* Corresponding authors.

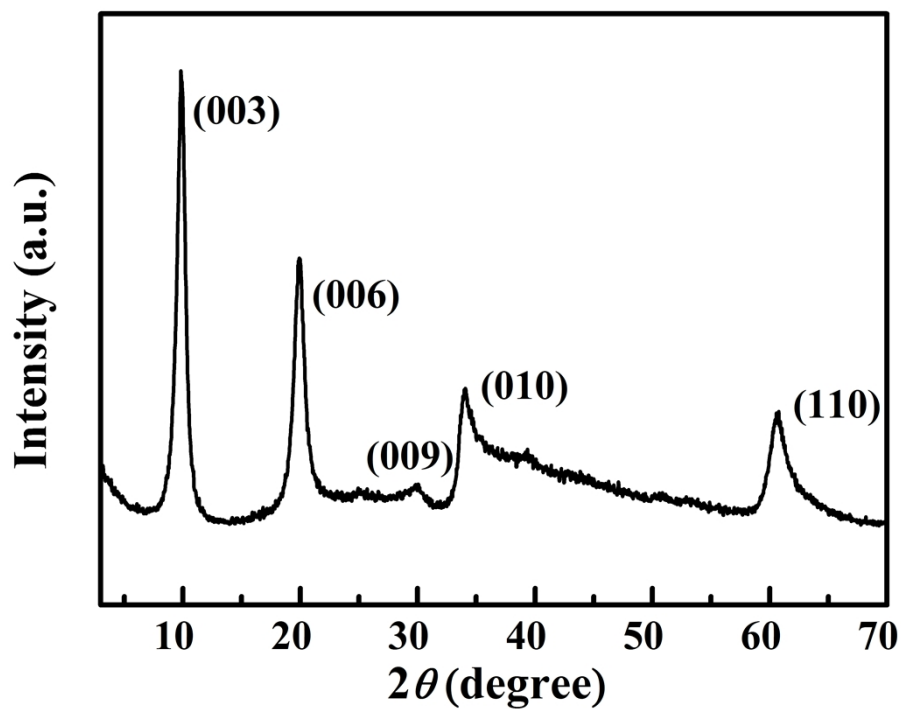

Fig. S1 XRD pattern of the ZnAl-LDH-NO<sub>3</sub>.

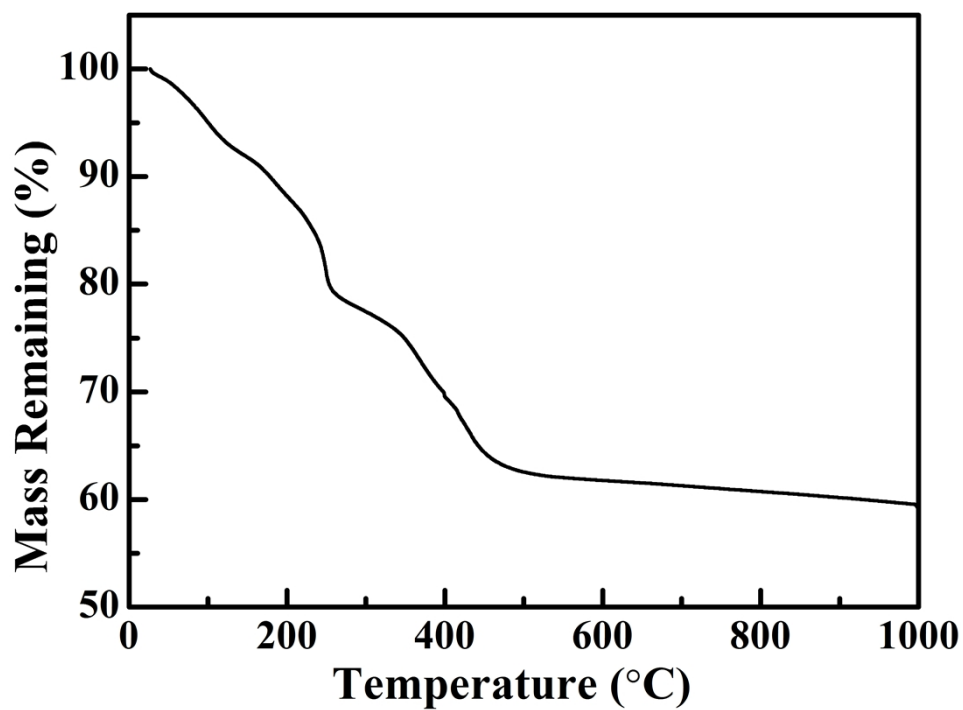

Fig. S2 TGA curve of the ZnAl-LDH-NO<sub>3</sub>.

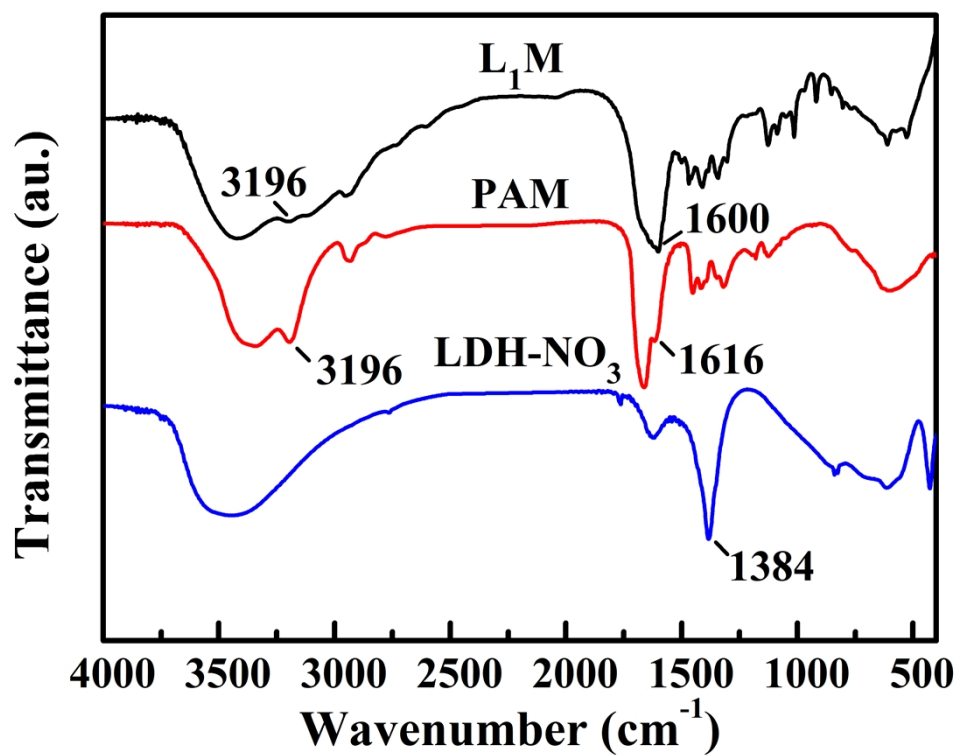

Fig. S3 FTIR spectra of the ZnAl-LDH-NO<sub>3</sub>, PAM and the LDH/PAM NC hydrogel (L<sub>1</sub>M).

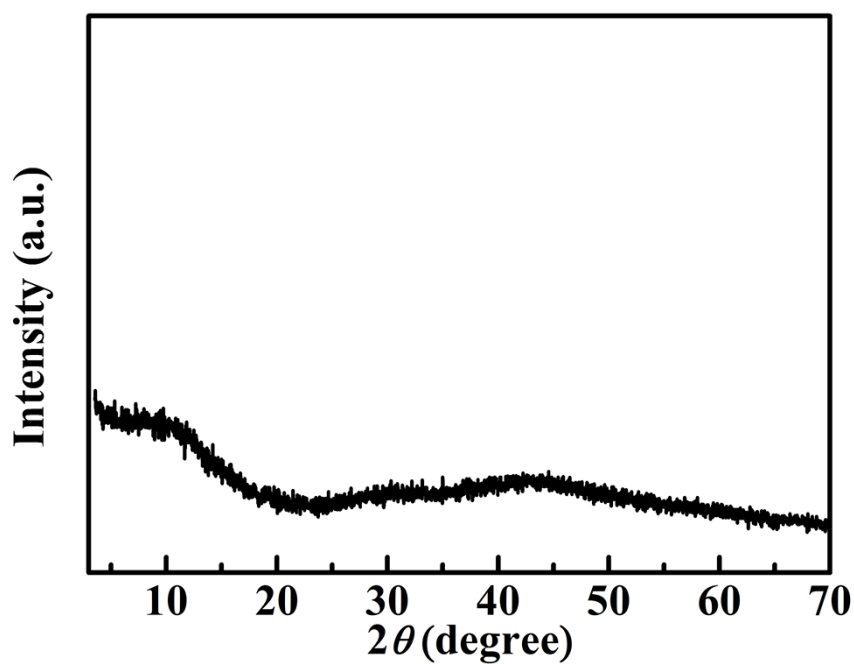

Fig. S4 XRD pattern of PAM/LDH NC hydrogel (L<sub>1</sub>M).
